# Supplementary material
Source: PubMed Central journal article supplement (PMC4784532)
Supplement: wala007070.wt1_default.pdf [file wala007070.wt1_default.pdf]

Table 4a Supplement. Beta coefficients for covariates in the adjusted absolute model of OEND implementation and unintentional opioid-related overdose death rates in 19 communities in Massachusetts, 2002-2009

| Absolute model                                                            | Adjusted Beta Estimate | Empirical Standard Error Estimates | p-value |
|---------------------------------------------------------------------------|------------------------|------------------------------------|---------|
| Low implementation:<br>1-100 enrolments per 100,000 vs. No implementation | -0.3157                | 0.1114                             | 0.0046  |
| High implementation:<br>>100 enrolments per 100,000 vs. No implementation | -0.6129                | 0.1699                             | 0.0003  |
| Medically supervised inpatient withdrawal treatment                       | 0                      | 0.0002                             | 0.988   |
| Methadone treatment                                                       | 0.0015                 | 0.0005                             | 0.0015  |
| Buprenorphine treatment                                                   | 0.0027                 | 0.0015                             | 0.0714  |
| Race/Ethnicity                                                            |                        |                                    |         |
| White, Non-Hispanic                                                       | -0.0128                | 0.0095                             | 0.181   |
| Hispanic                                                                  | -0.0233                | 0.0115                             | 0.0429  |
| Black/African American, Non-Hispanic                                      | -0.017                 | 0.0134                             | 0.2047  |
| Male                                                                      | -0.0984                | 0.0843                             | 0.243   |
| Under the age of 18                                                       | 0.0331                 | 0.0184                             | 0.0727  |
| Below poverty level                                                       | -0.009                 | 0.0165                             | 0.5868  |
| Prescriptions to doctor shoppers*                                         | 0.0031                 | 0.0049                             | 0.5316  |
| Year (as a linear term)                                                   | 0.0937                 | 0.0245                             | 0.0001  |

\* Schedule II opioid prescriptions dispensed to “doctor shoppers” per total opioid prescriptions dispensed. Doctor shoppers were individuals who had schedule II opioid prescriptions from  $\geq 4$  prescribers and filled prescriptions at  $\geq 4$  pharmacies in a 12 month period.

Table 4b Supplement. Beta coefficients for covariates in the adjusted relative model of OEND implementation and unintentional opioid-related overdose death rates in 19 communities in Massachusetts, 2002-2009

| Relative model                                                  | Adjusted Beta Estimate | Empirical Standard Error Estimates | p-value |
|-----------------------------------------------------------------|------------------------|------------------------------------|---------|
| Low implementation:<br>< the median vs. No implementation       | -0.3394                | 0.1174                             | 0.0038  |
| High implementation:<br>$\geq$ the median vs. No Implementation | -0.2483                | 0.1311                             | 0.0582  |
| Medically supervised inpatient withdrawal treatment             | 0                      | 0.0002                             | 0.9909  |
| Methadone treatment                                             | 0.0015                 | 0.0005                             | 0.0016  |
| Buprenorphine treatment                                         | 0.001                  | 0.0016                             | 0.5024  |
| Race/Ethnicity                                                  |                        |                                    |         |
| White, Non-Hispanic                                             | -0.0112                | 0.0087                             | 0.1991  |
| Hispanic                                                        | -0.0215                | 0.0113                             | 0.0577  |
| Black/African American, Non-Hispanic                            | -0.0188                | 0.0127                             | 0.1375  |
| Male                                                            | -0.0865                | 0.0771                             | 0.2622  |
| Under the age of 18                                             | 0.0371                 | 0.0184                             | 0.0441  |
| Below poverty level                                             | -0.0101                | 0.019                              | 0.5949  |
| Prescriptions to doctor shoppers*                               | 0.0034                 | 0.0049                             | 0.4933  |
| Year (as a linear term)                                         | 0.088                  | 0.0254                             | 0.0005  |

\* Schedule II opioid prescriptions dispensed to “doctor shoppers” per total opioid prescriptions dispensed. Doctor shoppers were individuals who had schedule II opioid prescriptions from  $\geq 4$  prescribers and filled prescriptions at  $\geq 4$  pharmacies in a 12 month period.
