# Supplementary material
Source: PubMed Central journal article supplement (PMC4784532)
Supplement: wala007070.wt2_default.pdf [file wala007070.wt2_default.pdf]

Table 5a supplement. Beta coefficients for covariates in the adjusted absolute model of acute care hospitalizations in 19 communities in Massachusetts, 2002-2009

| Absolute model                                                            | Adjusted Beta Estimate | Empirical Standard Error Estimates | p-value |
|---------------------------------------------------------------------------|------------------------|------------------------------------|---------|
| Low implementation:<br>1-100 enrolments per 100,000 vs. No implementation | -0.0694                | 0.0766                             | 0.3647  |
| High implementation:<br>>100 enrolments per 100,000 vs. No implementation | -0.0792                | 0.1047                             | 0.4493  |
| Medically supervised inpatient withdrawal treatment                       | 0.0004                 | 0.0001                             | <.0001  |
| Methadone treatment                                                       | 0.001                  | 0.0004                             | 0.0099  |
| Buprenorphine treatment                                                   | 0.0004                 | 0.0007                             | 0.5274  |
| Race/Ethnicity                                                            |                        |                                    |         |
| White, Non-Hispanic                                                       | 0.0123                 | 0.0073                             | 0.0906  |
| Hispanic                                                                  | 0.0033                 | 0.0095                             | 0.7244  |
| Black/African American, Non-Hispanic                                      | 0.0166                 | 0.0119                             | 0.1637  |
| Male                                                                      | -0.0171                | 0.0707                             | 0.8093  |
| Under the age of 18                                                       | 0.0204                 | 0.016                              | 0.2031  |
| Below poverty level                                                       | -0.0035                | 0.0146                             | 0.8096  |
| Prescriptions to doctor shoppers*                                         | -0.0021                | 0.0049                             | 0.5316  |
| Year (as a linear term)                                                   | 0.053                  | 0.0245                             | 0.0001  |

\* Schedule II opioid prescriptions dispensed to “doctor shoppers” per total opioid prescriptions dispensed. Doctor shoppers were individuals who had schedule II opioid prescriptions from  $\geq 4$  prescribers and filled prescriptions at  $\geq 4$  pharmacies in a 12 month period.

Table 5b supplement. Beta coefficients for covariates in the adjusted relative model of acute care hospitalizations in 19 communities in Massachusetts, 2002-2009

| Relative model                                                  | Adjusted Beta Estimate | Empirical Standard Error Estimates | p-value |
|-----------------------------------------------------------------|------------------------|------------------------------------|---------|
| Low implementation:<br>< the median vs. No implementation       | -0.1019                | 0.0857                             | 0.2346  |
| High implementation:<br>$\geq$ the median vs. No Implementation | -0.0021                | 0.0765                             | 0.9784  |
| Medically supervised inpatient withdrawal treatment             | 0.0004                 | 0.0765                             | <.0001  |
| Methadone treatment                                             | 0.0009                 | 0.0001                             | 0.0323  |
| Buprenorphine treatment                                         | 0.0001                 | 0.0004                             | 0.9374  |
| Race/Ethnicity                                                  |                        |                                    |         |
| White, Non-Hispanic                                             | 0.0126                 | 0.0071                             | 0.0758  |
| Hispanic                                                        | 0.0024                 | 0.0093                             | 0.7962  |
| Black/African American, Non-Hispanic                            | 0.0144                 | 0.0119                             | 0.2282  |
| Male                                                            | -0.0207                | 0.0695                             | 0.7661  |
| Under the age of 18                                             | 0.022                  | 0.0162                             | 0.1729  |
| Below poverty level                                             | 0.002                  | 0.0166                             | 0.9022  |
| Prescriptions to doctor shoppers*                               | -0.0028                | 0.0041                             | 0.4925  |
| Year (as a linear term)                                         | 0.0514                 | 0.0189                             | 0.0067  |

\* Schedule II opioid prescriptions dispensed to “doctor shoppers” per total opioid prescriptions dispensed. Doctor shoppers were individuals who had schedule II opioid prescriptions from  $\geq 4$  prescribers and filled prescriptions at  $\geq 4$  pharmacies in a 12 month period.
