# Supplementary material
Source: PubMed Central journal article supplement (PMC4784532)
Supplement: wala007070.wt3_default.pdf [file wala007070.wt3_default.pdf]

**Table 6** Control models of overdose education and nasal naloxone distribution implementation and ratio of opioid related overdose deaths to cancer deaths in 19 communities\* in Massachusetts, 2002-09

| <b>Cumulative enrolments per 100 000 population</b> | <b>Adjusted <math>\beta</math> estimate<sup>†</sup></b> | <b>P value</b> |
|-----------------------------------------------------|---------------------------------------------------------|----------------|
| Absolute model:                                     |                                                         |                |
| No implementation                                   | Reference                                               |                |
| Low implementation: 1-100 enrolments                | -0.0222                                                 | 0.01           |
| High implementation: >100 enrolments                | -0.0326                                                 | 0.01           |
| Relative model:                                     |                                                         |                |
| No implementation                                   | Reference                                               |                |
| Low implementation: <median                         | -0.0238                                                 | <0.01          |
| High implementation: >median                        | -0.0183                                                 | 0.07           |

\*Geographically distinct cities and towns.

<sup>†</sup>Adjusted for city/town population rates of age under 18, male, race or ethnicity (Hispanic, white, black, other), below poverty level, medically supervised inpatient withdrawal treatment, methadone treatment, Bureau of Substance Abuse Services funded buprenorphine treatment, prescriptions to doctor shoppers (individuals with schedule II opioid prescriptions from  $\geq 4$  prescribers and filled prescriptions at  $\geq 4$  pharmacies in 12 month period), and year.
